# Supplementary material for: 2-Chloro-3-cyano-4-nitrobenzyl pyridinium bromide as a potent anti-lung cancer molecule prepared using a single-step solvent-free method
Source: Royal Society of Chemistry journal article supplement (doi:10.1039/d4ra03538k), 2024-01-01

## Supplementary material

# 2-Chloro-3-cyano-4-nitrobenzyl pyridinium bromide as potent lung cancer molecule from single step solvent free method

Sadaiyan Govindaraj<sup>a</sup>, Kilivelu Ganesan<sup>a\*</sup>, Perumal Elumalai<sup>b</sup>, Rajanathadurai Jeevitha<sup>b</sup>, Subramani Annadurai<sup>c</sup>, Mohammed Amanullah<sup>d</sup>, Awad Saeed Al-Samghan<sup>e</sup>

<sup>a</sup>PG& Research Department of Chemistry, Presidency College, Chennai – 600005, India.

<sup>b</sup>Cancer Genomics lab, Center for Global Health Research, Saveetha Medical College and Hospitals, Saveetha Institute of Medical and Technical Sciences, Chennai – 602105, India.

<sup>c</sup>Department of biochemistry, Dwaraka Doss Goverdhan Doss Vaishnav College Chennai- 600106, India.

<sup>d</sup>Department of Clinical Biochemistry, College of Medicine, King Khalid University, Abha 61413, Kingdom of Saudi Arabia.

<sup>e</sup>Department of Family Medicine and Community Medicine, College of Medicine, King Khalid University, Abha, Kingdom of Saudi Arabia.

### SUPPORTING INFORMATION

|                                          |   |       |     |
|------------------------------------------|---|-------|-----|
| <sup>1</sup> H NMR Spectrum of compound  | 1 | ..... | S1  |
| <sup>13</sup> C NMR Spectrum of compound | 1 | ..... | S2  |
| HRMS Spectrum of compound                | 1 | ..... | S3  |
| <sup>1</sup> H NMR Spectrum of compound  | 2 | ..... | S4  |
| <sup>13</sup> C NMR Spectrum of compound | 2 | ..... | S5  |
| HRMS Spectrum of compound                | 2 | ..... | S6  |
| <sup>1</sup> H NMR Spectrum of compound  | 3 | ..... | S7  |
| <sup>13</sup> C NMR Spectrum of compound | 3 | ..... | S8  |
| HRMS Spectrum of compound                | 3 | ..... | S9  |
| <sup>1</sup> H NMR Spectrum of compound  | 4 | ..... | S10 |
| <sup>13</sup> C NMR Spectrum of compound | 4 | ..... | S11 |
| HRMS Spectrum of compound                | 4 | ..... | S12 |
| <sup>1</sup> H NMR Spectrum of compound  | 5 | ..... | S13 |
| <sup>13</sup> C NMR Spectrum of compound | 5 | ..... | S14 |
| HRMS Spectrum of compound                | 5 | ..... | S15 |

<sup>1</sup>HNMR spectrum of 1,1'-(hexane-1,6-diyl)bis(2-chloro-3-cyano)pyridin-1-ium bromide **1**

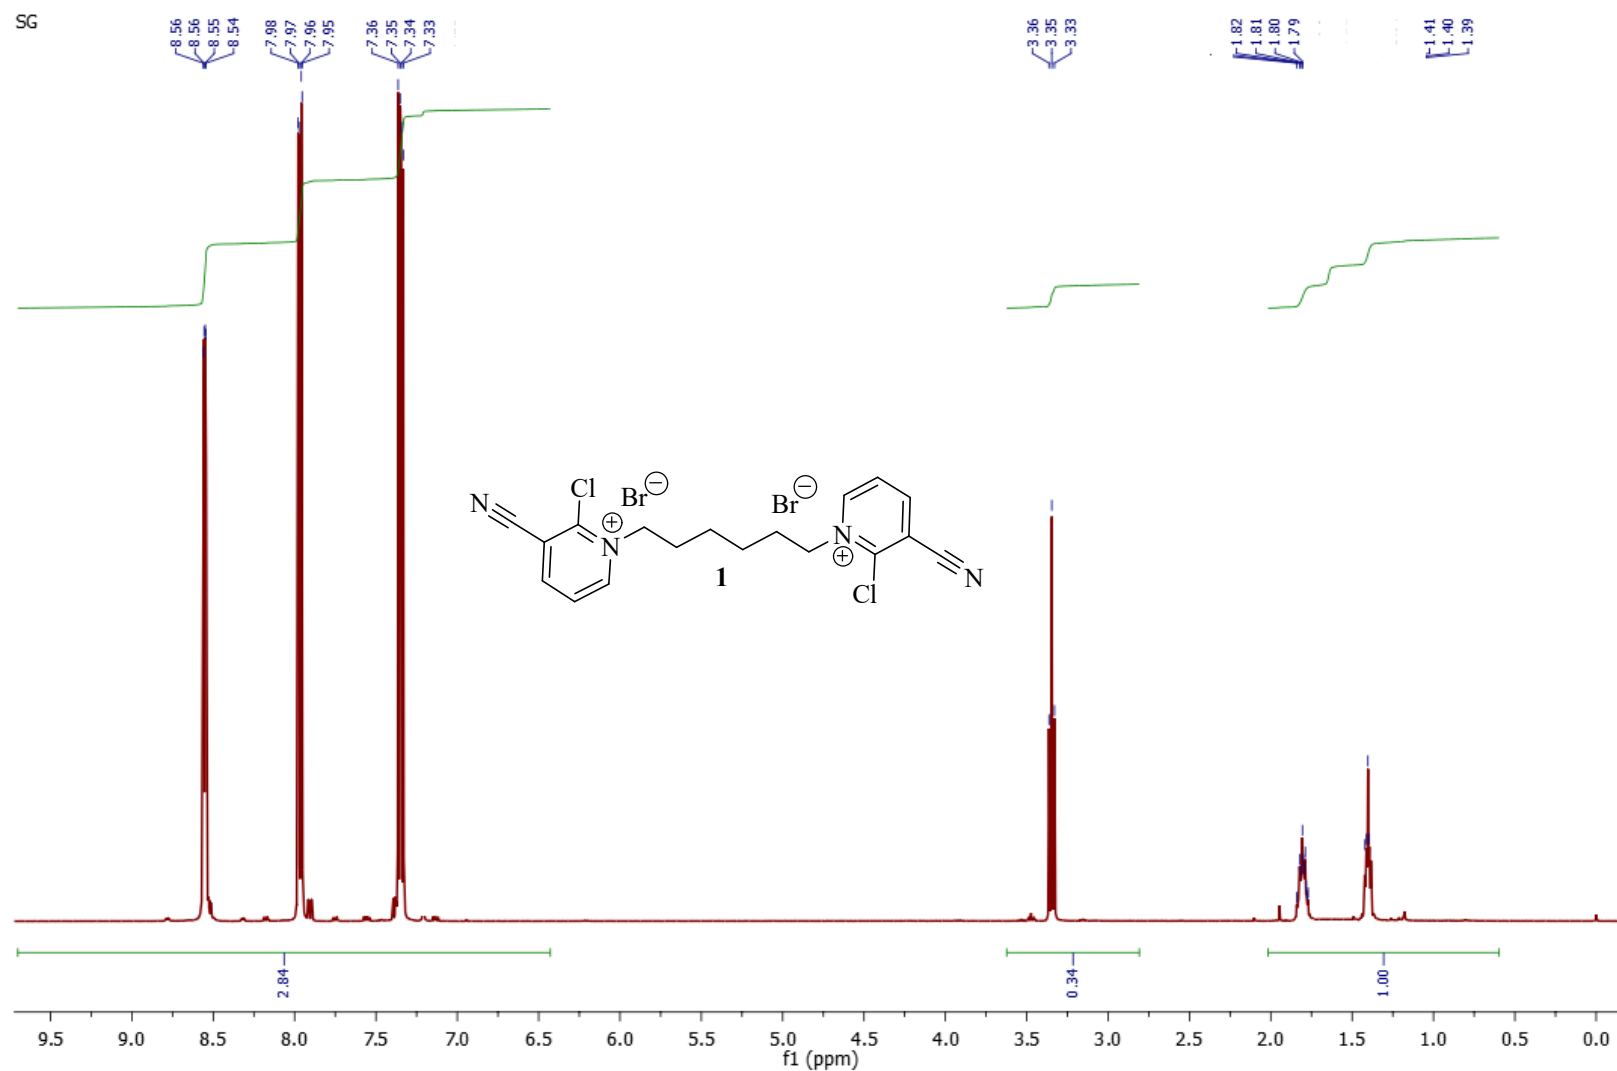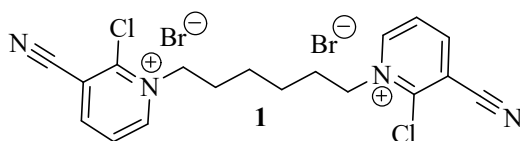

S1

$^{13}\text{C}$ NMR spectrum of 1.1'-(hexane-1,6-diyl)bis(2-chloro-3-cyano)pyridin-1-ium bromide **1**

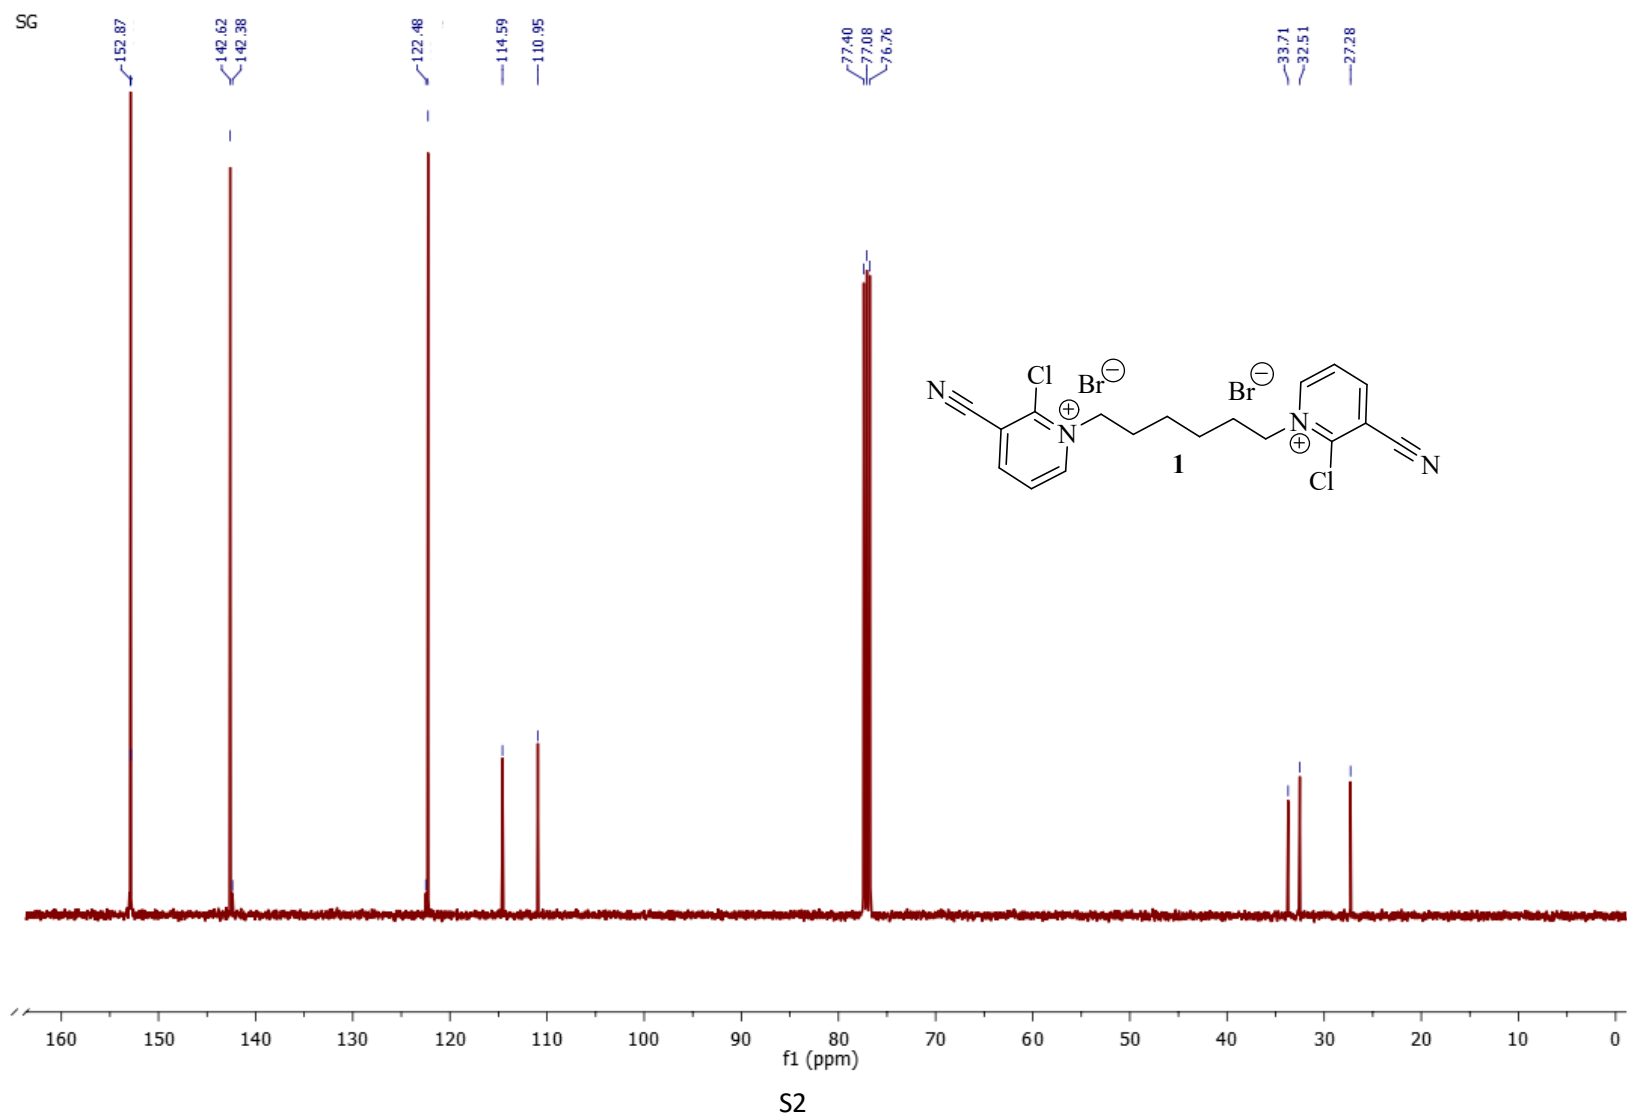

HRMS spectrum of 1,1'-(hexane-1,6-diyl)bis(2-chloro-3-cyano)pyridin-1-ium bromide **1**

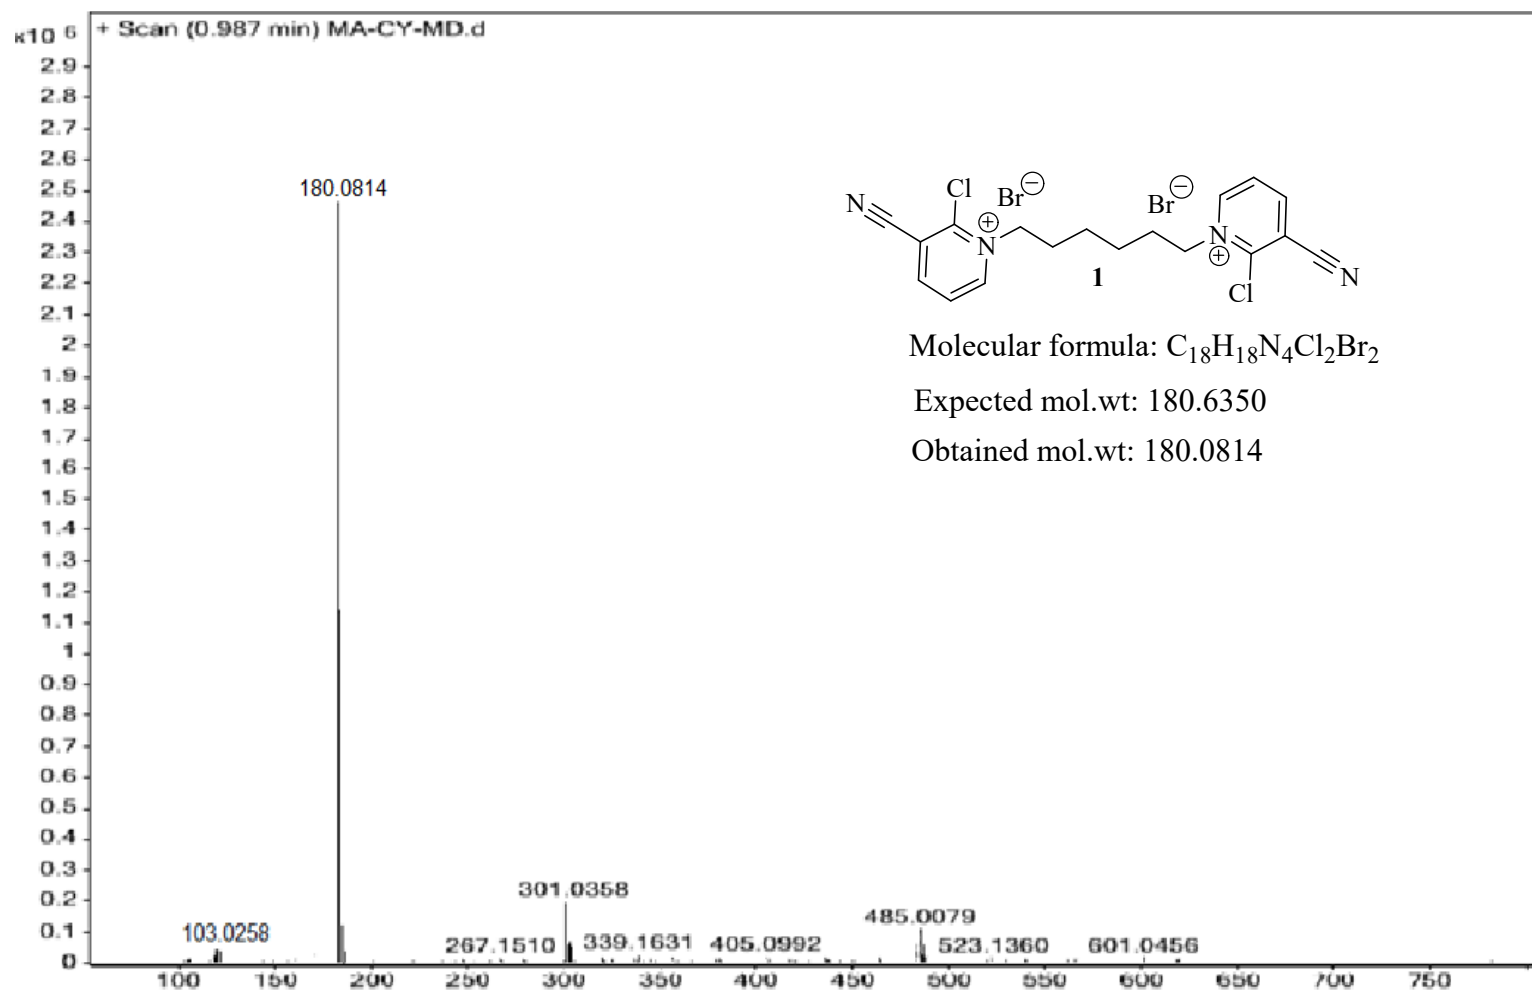

<sup>1</sup>HNMR spectrum of 1,1'-(1,3-phenylenebis(methylene))bis(2-chloro-3-cyano)pyridin-1-ium bromide **2**

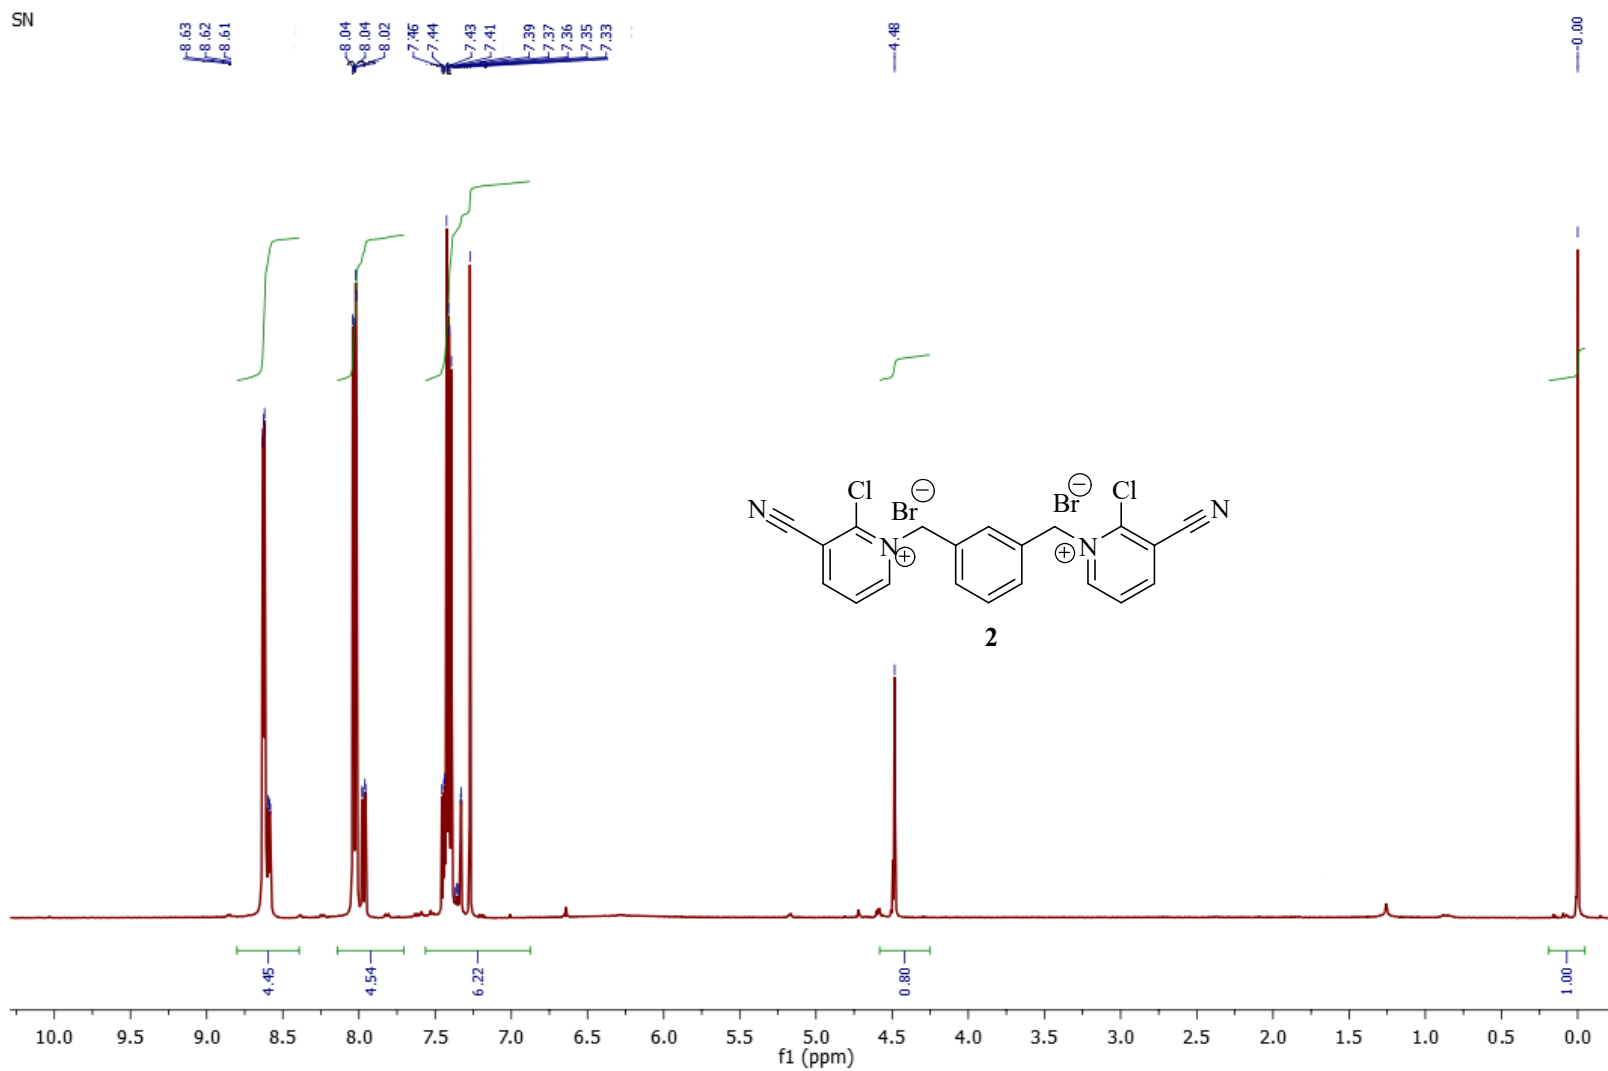

$^{13}\text{C}$ NMR spectrum of 1,1'-(1,3-phenylenebis(methylene))bis(2-chloro-3-cyano)pyridin-1-ium bromide 2

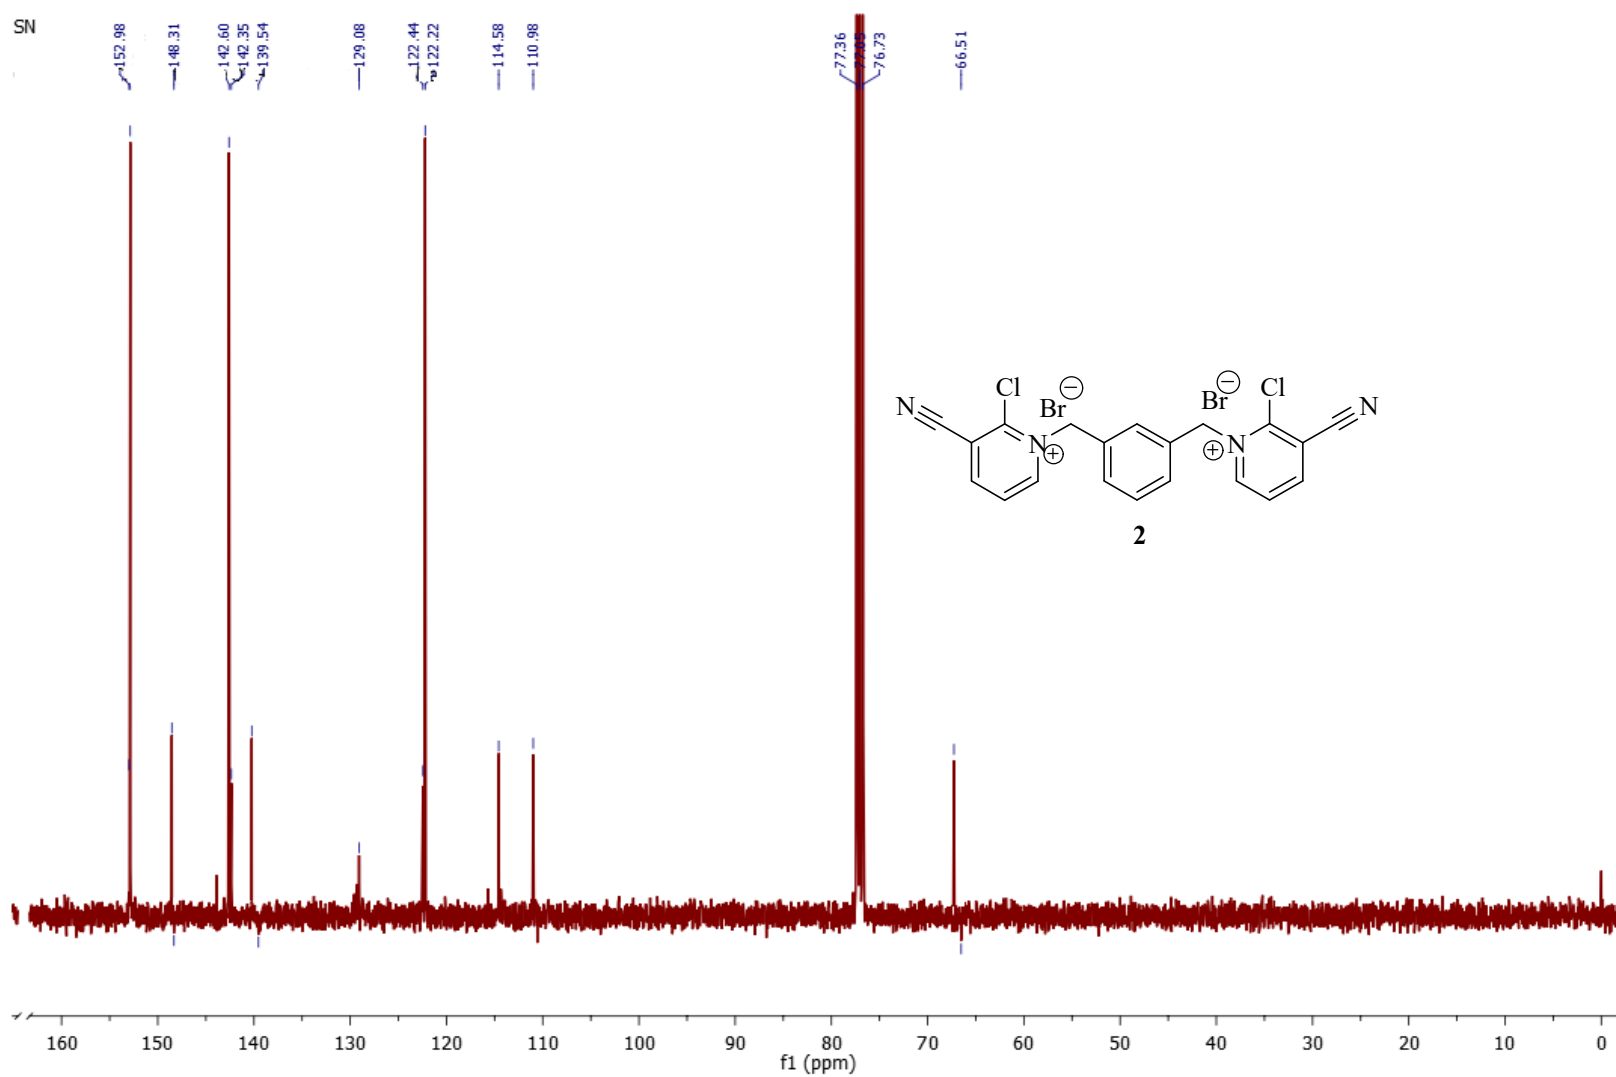

HRMS spectrum of 1,1'-(1,3-phenylenebis(methylene))bis(2-chloro-3-cyano)pyridin-1-ium bromide **2**

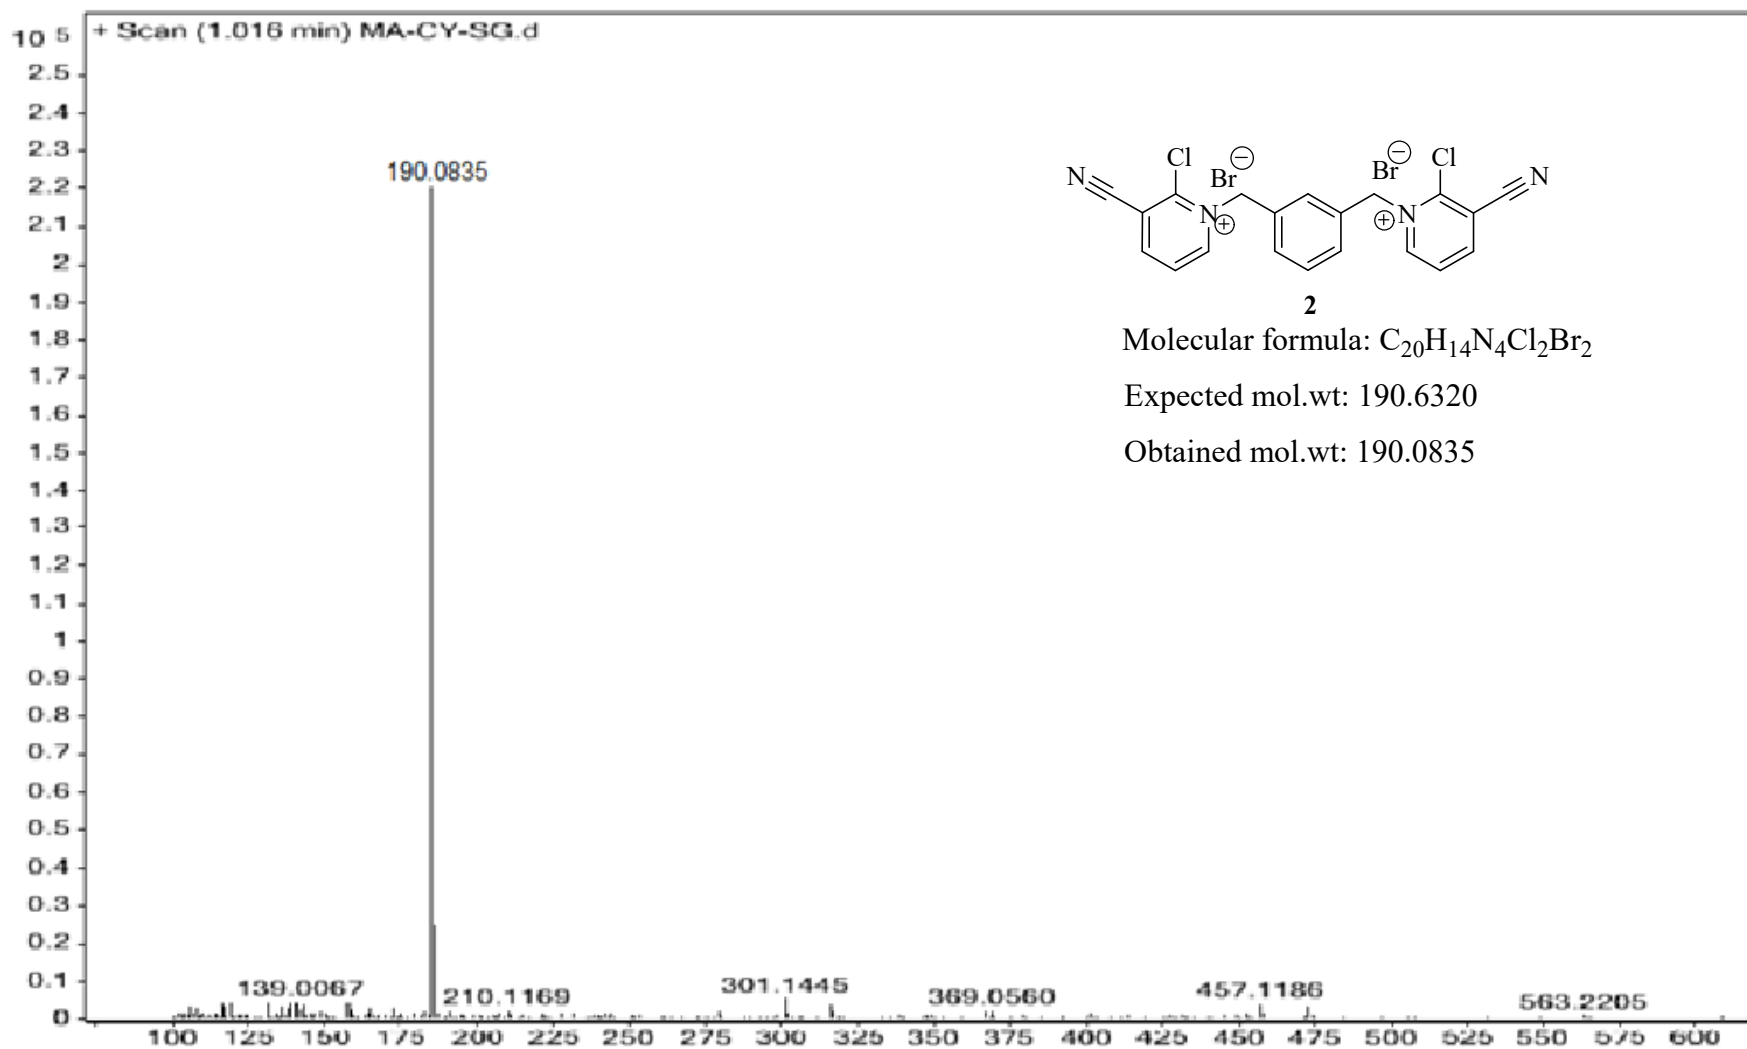

<sup>1</sup>HNMR spectrum of 2-chloro-3-cyano-1-(4-nitrobenzyl)pyridin-1-ium bromide **3**

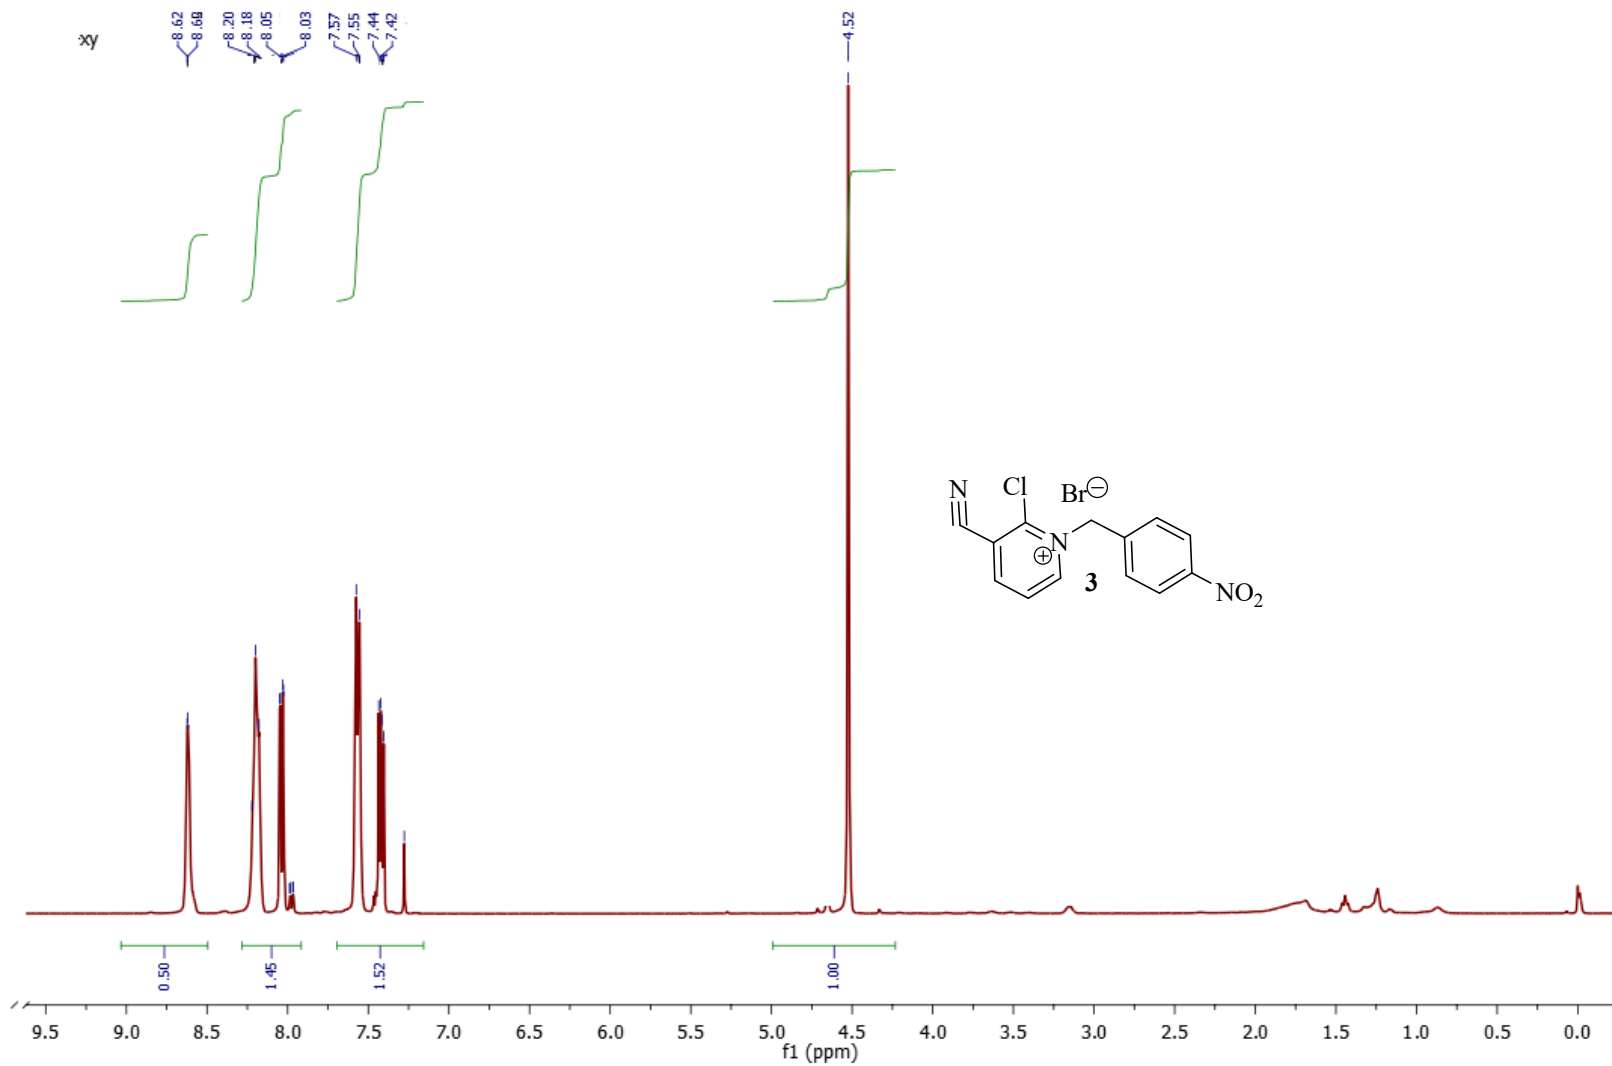



<sup>13</sup>CNMR spectrum of 2-chloro-3-cyano-1-(4-nitrobenzyl)pyridin-1-ium bromide **3**

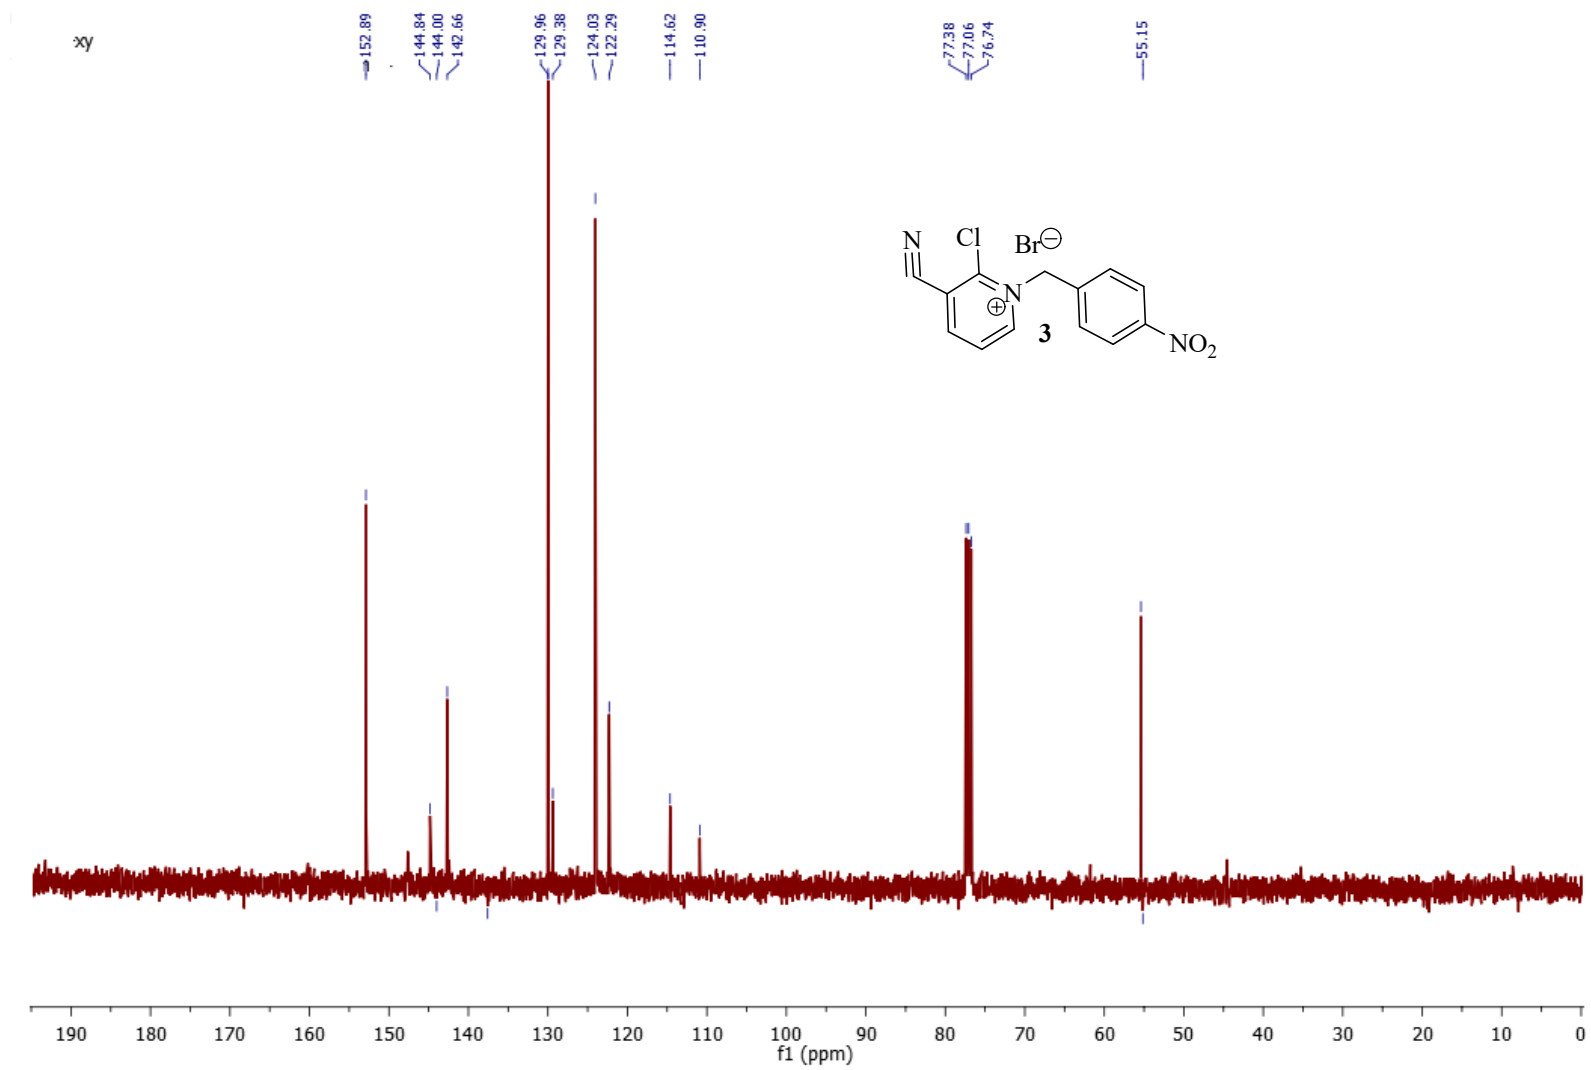

HRMS spectrum of 2-chloro-3-cyano-1-(4-nitrobenzyl)pyridin-1-ium bromide **3**

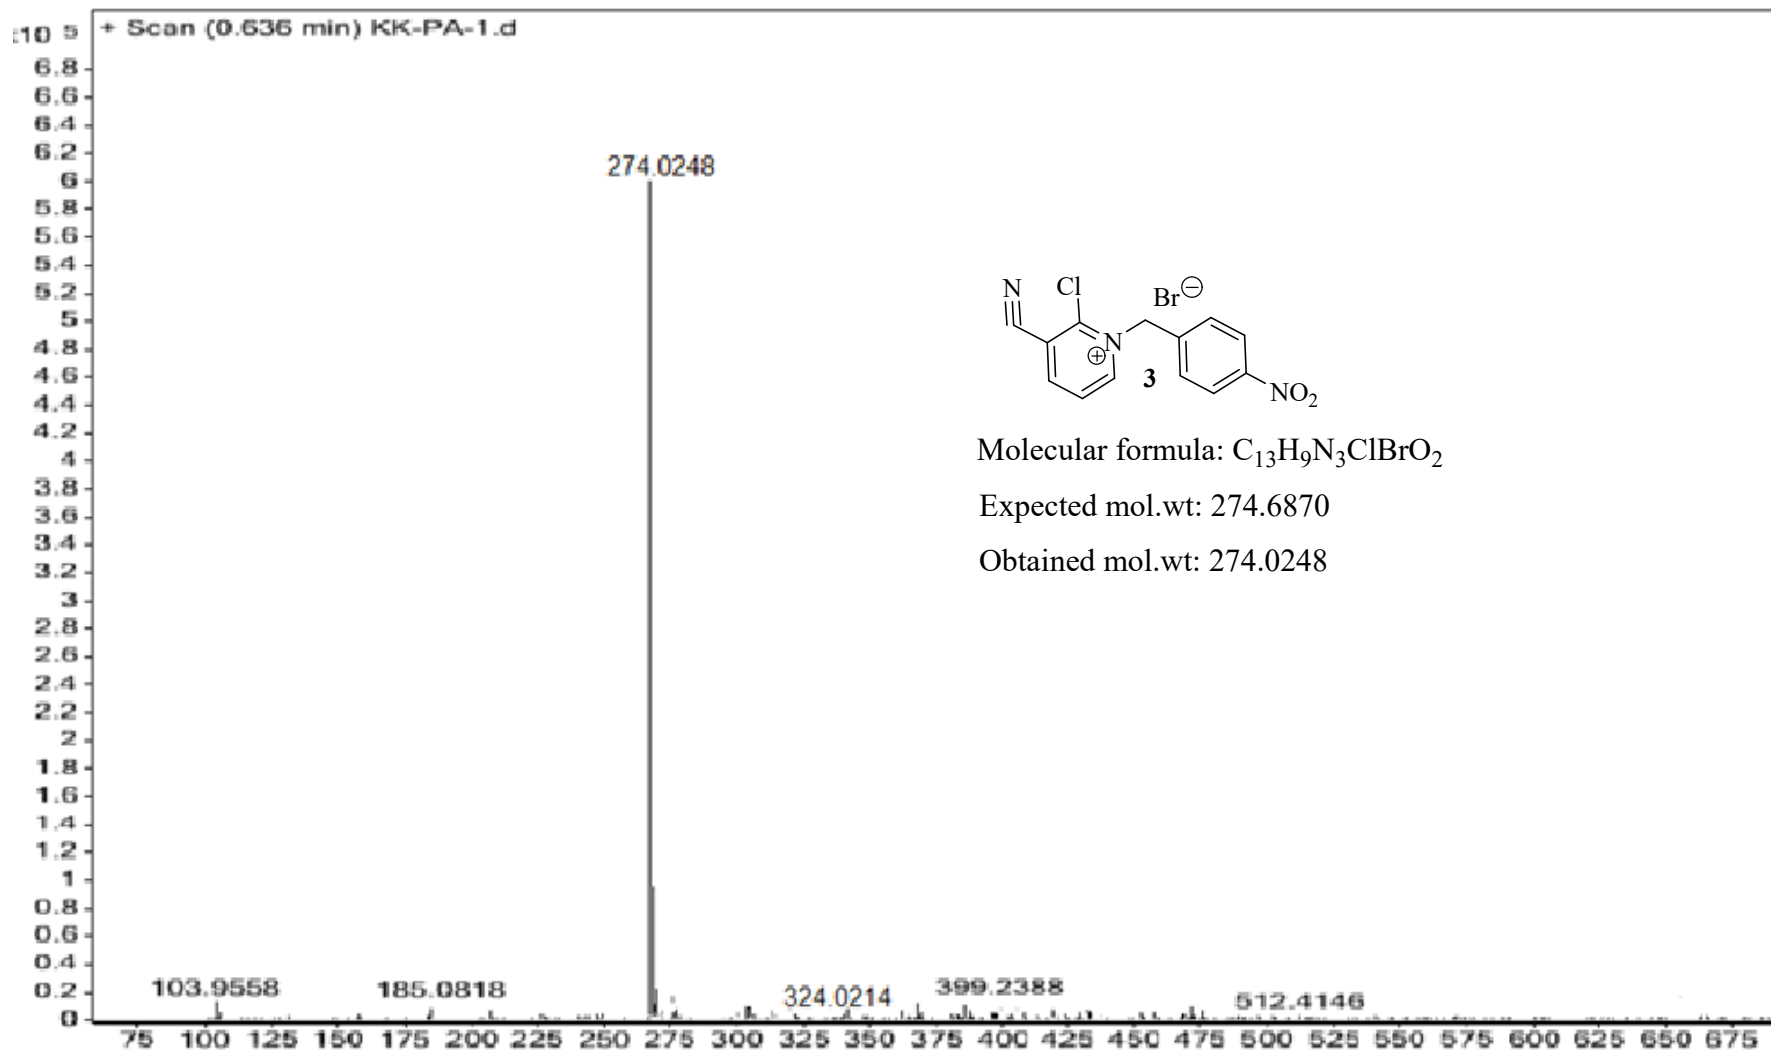

<sup>1</sup>HNMR spectrum of 2,2'-(hexane-1,6-diyl)bis(5-amino-4-cyano-1-phenyl)-1H-pyrazol-2-ium bromide 4

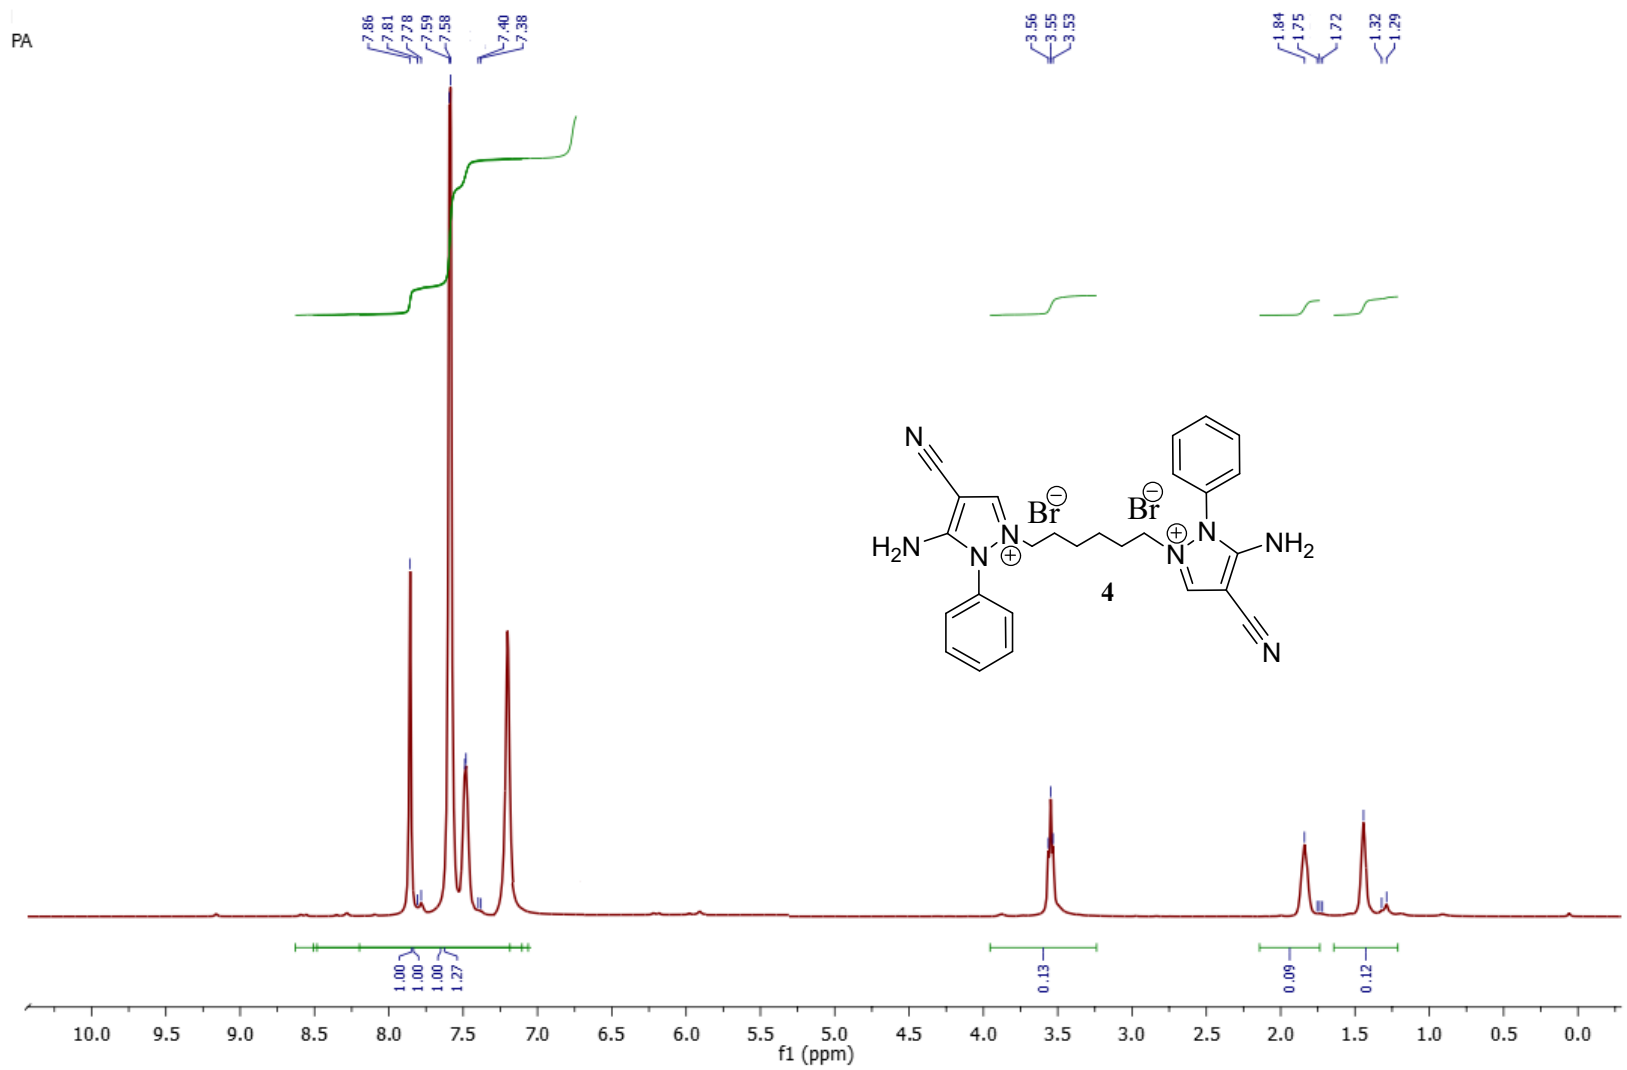

$^{13}\text{C}$ NMR spectrum of 2,2'-(hexane-1,6-diyl)bis(5-amino-4-cyano-1-phenyl)-1H-pyrazol-2-ium bromide **4**

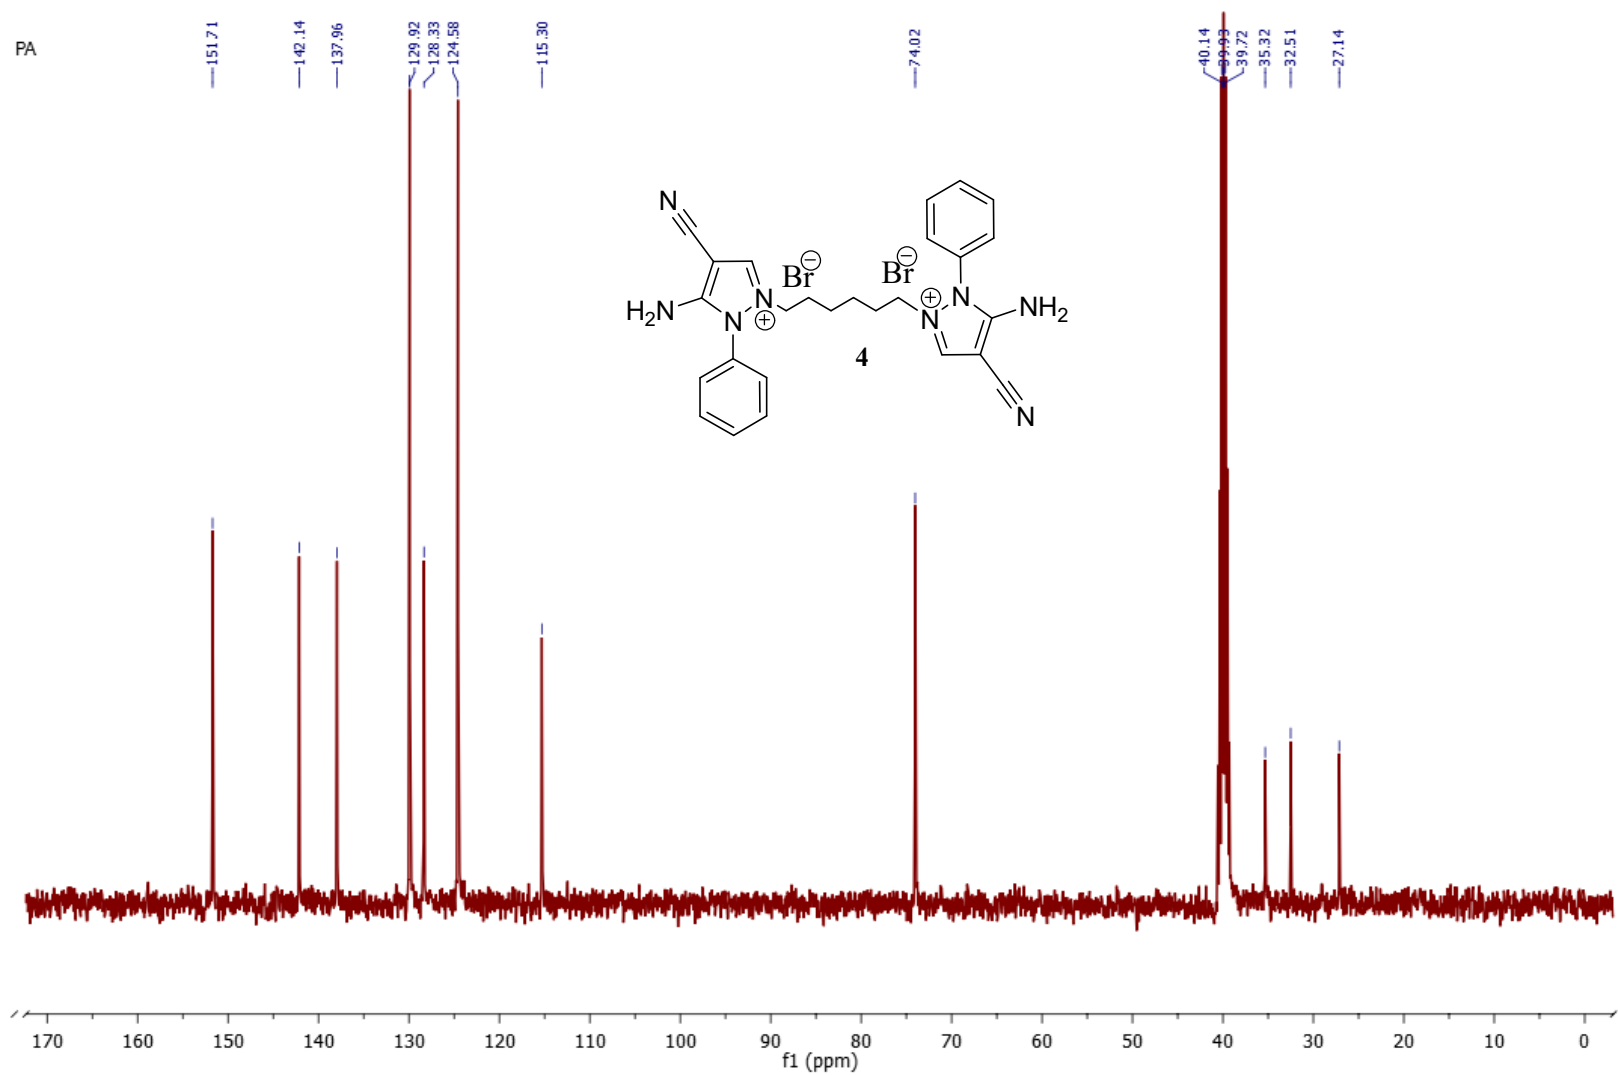

HRMS spectrum of 2,2'-(hexane-1,6-diyl)bis(5-amino-4-cyano-1-phenyl)-1H-pyrazol-2-ium bromide 4

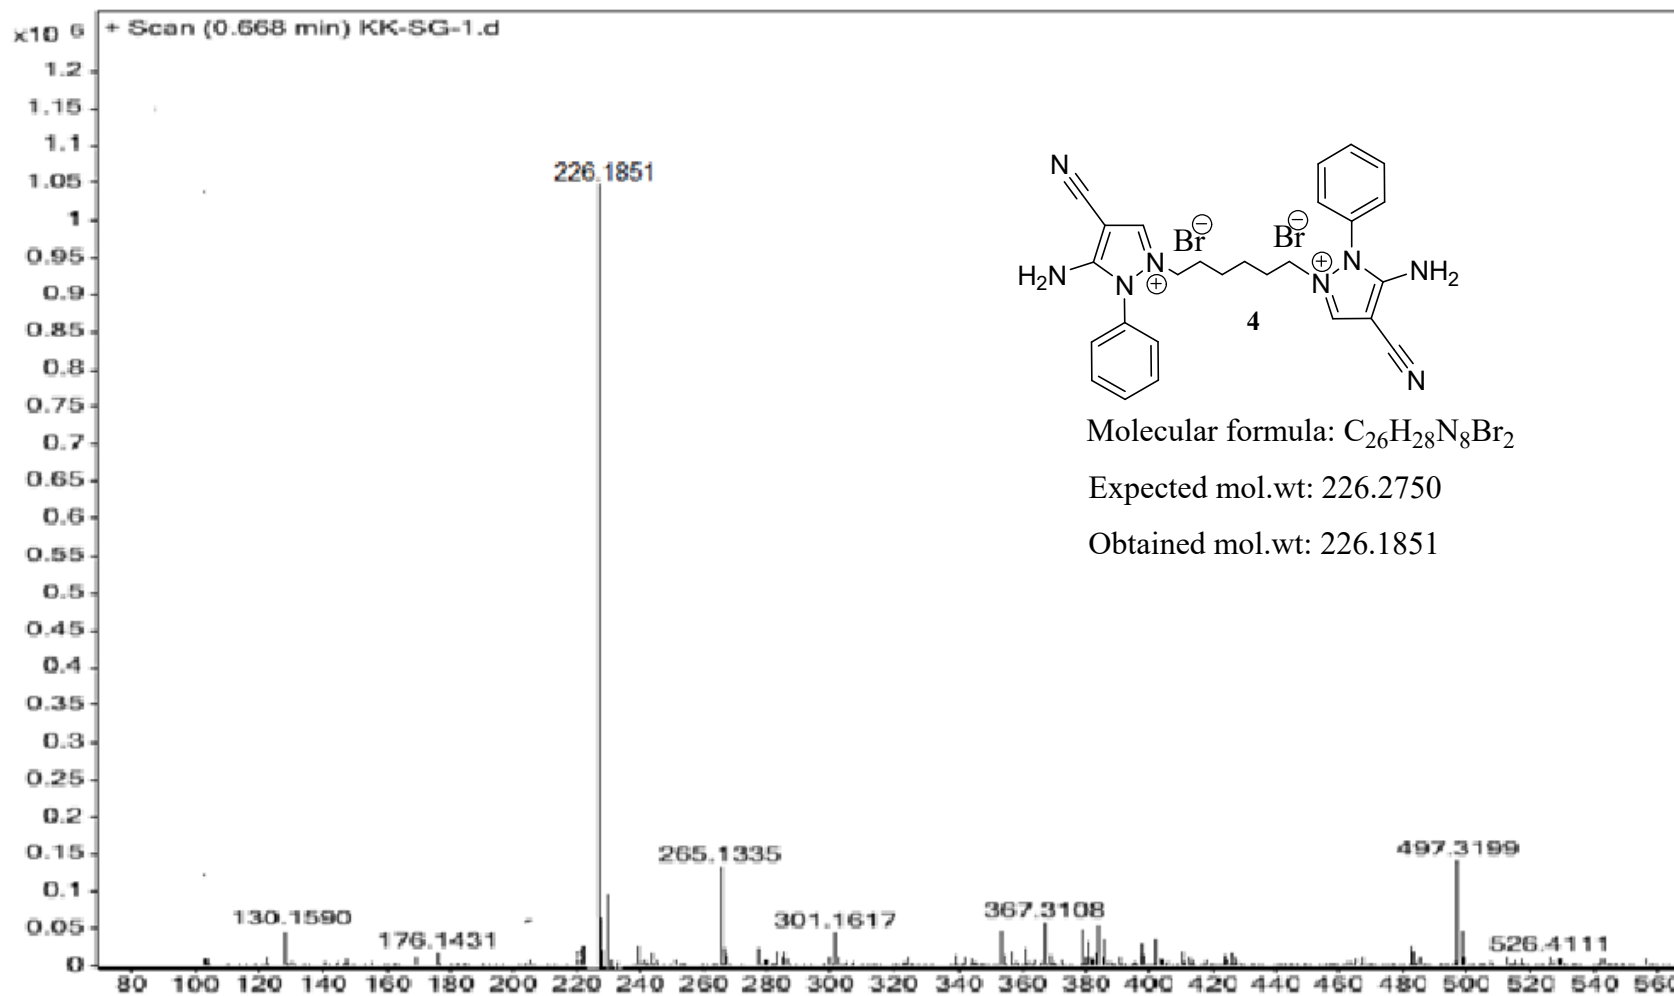

<sup>1</sup>H NMR spectrum of 2,2'-(1,3-phenylenebis(methylene))bis(5-amino-4-cyano-1-phenyl)-1H-pyrazol-2-ium bromide **5**

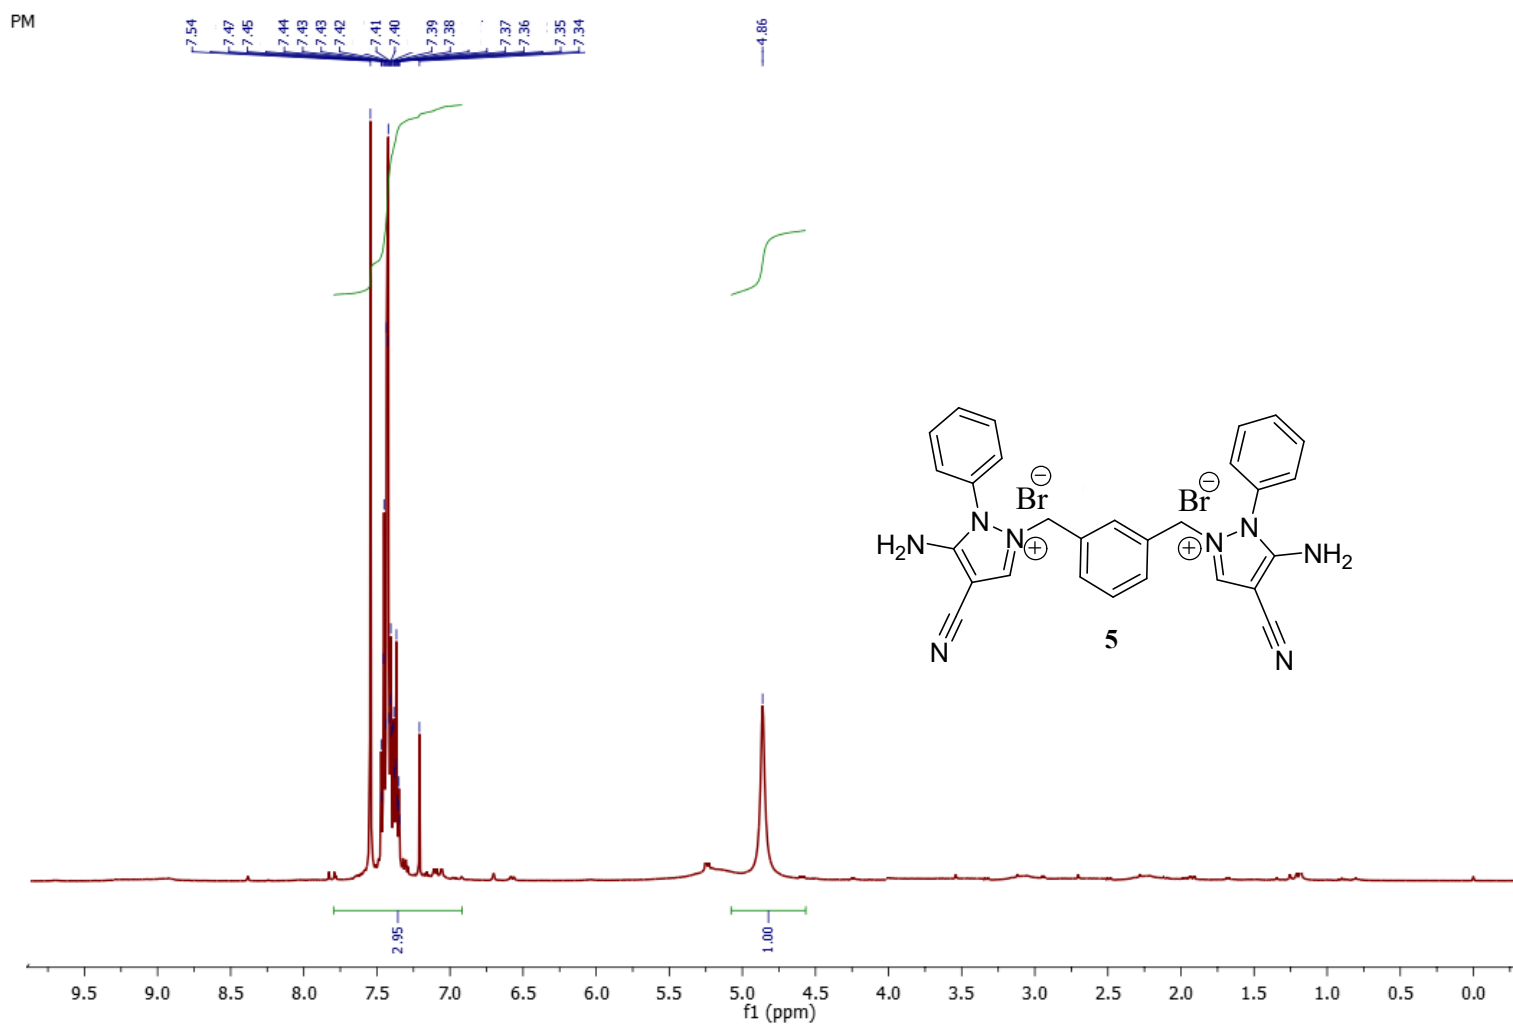

$^{13}\text{C}$ NMR spectrum of 2,2'-(1,3-phenylenebis(methylene))bis(5-amino-4-cyano-1-phenyl)-1H-pyrazol-2-ium bromide 5

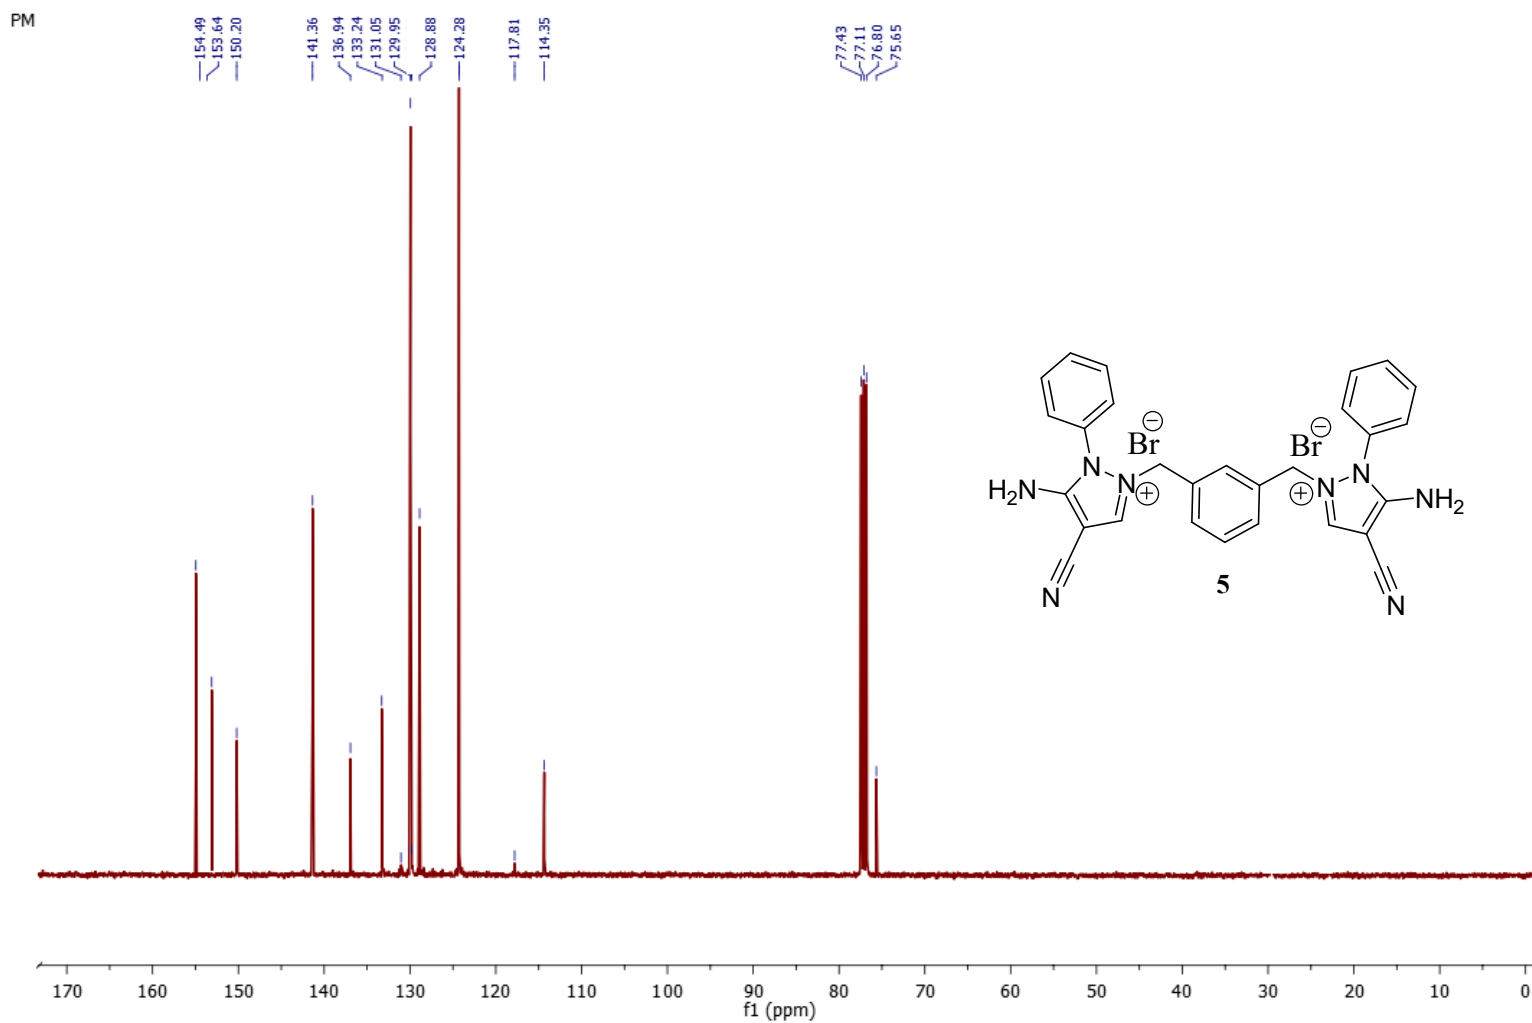

HRMS spectrum of 2,2'-(1,3-phenylenebis(methylene))bis(5-amino-4-cyano-1-phenyl)-1H-pyrazol-2-ium bromide 5

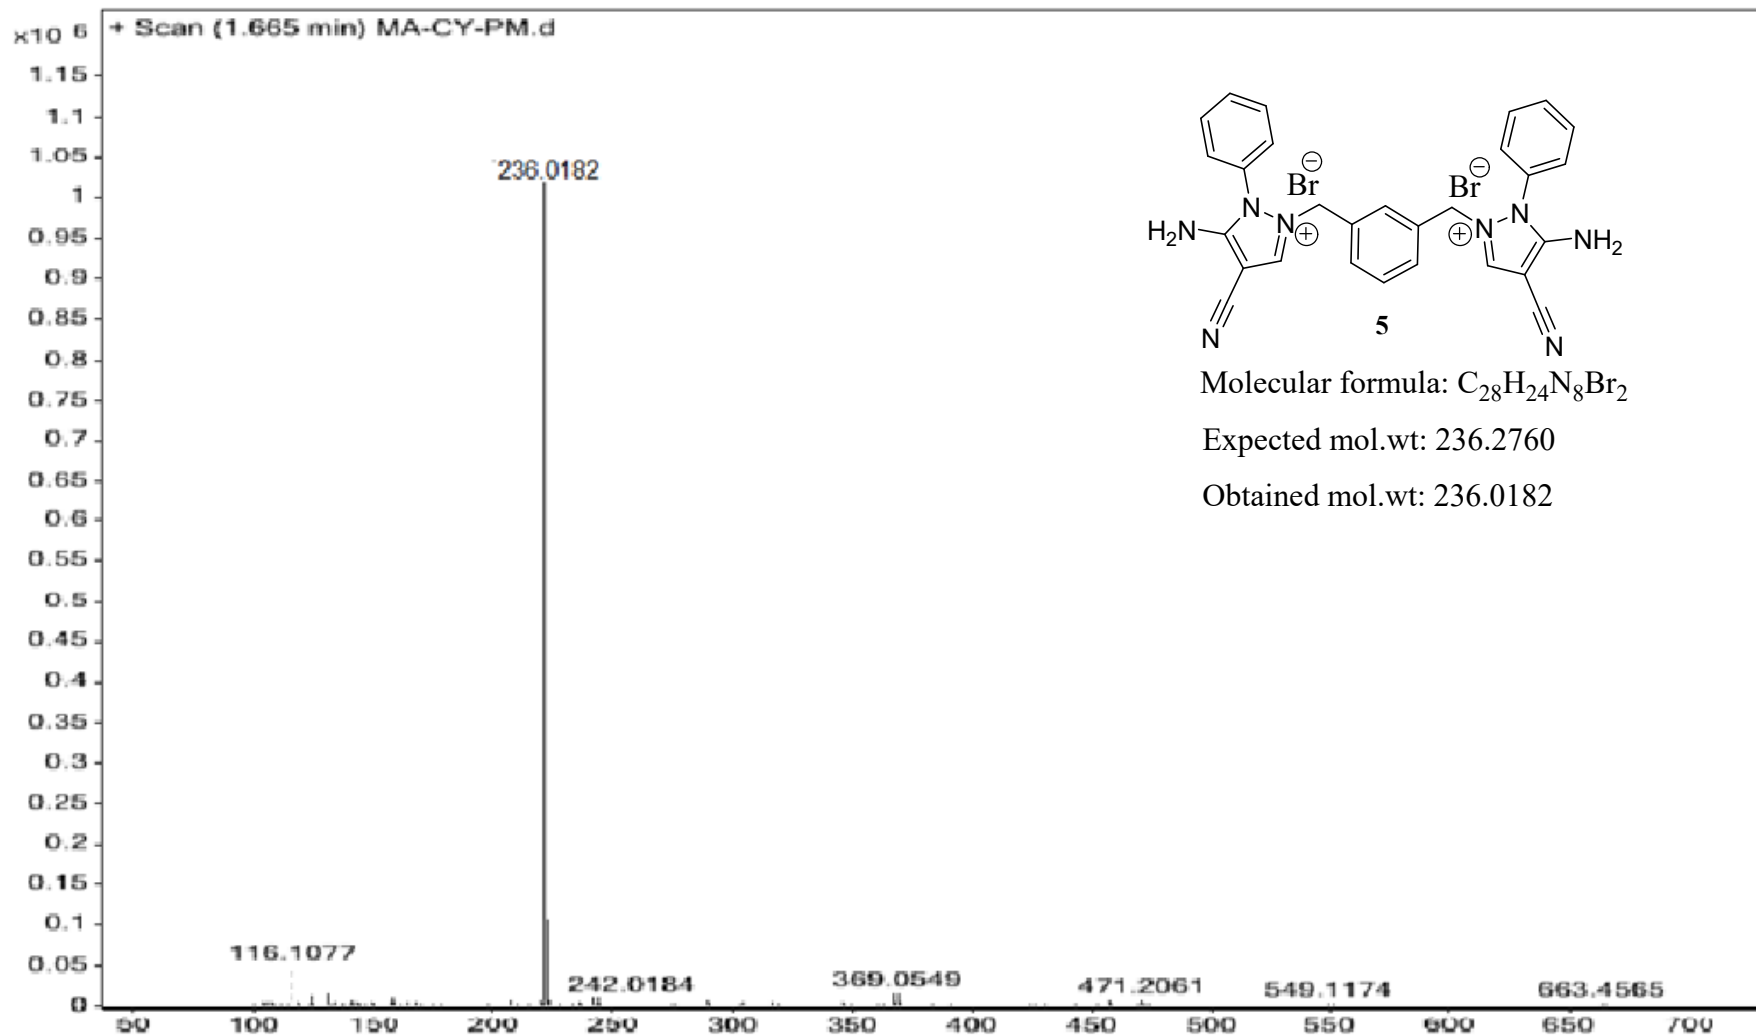

Supplement: d4ra03538k2.pdf [file d4ra03538k2.pdf]
